# Supplementary material for: In situ investigation of mesoporous silicon oxidation kinetics using infrared emittance spectroscopy
Source: Royal Society of Chemistry journal article supplement (doi:10.1039/c6cp02086k), 2016-01-01
Supplement: c6cp02086k1.pdf [file c6cp02086k1.pdf]

## **IN SITU INVESTIGATION OF MESOPOROUS SILICON OXIDATION KINETICS USING INFRARED EMITTANCE SPECTROSCOPY**

Benjamin Bardet,<sup>a</sup> Domingos De Sousa Meneses,<sup>b</sup> Thomas Defforge,<sup>a</sup> Jérôme Billoué,<sup>a</sup> Gaël Gautier<sup>a\*</sup>

<sup>a</sup> Université François Rabelais de Tours, CNRS, CEA, INSA-CVL, GREMAN UMR 7347, Tours, France.

<sup>b</sup> CNRS, CEMHTI UPR3079, Université d'Orléans, F-45071 Orléans, France.

\*Corresponding author: [gael.gautier@univ-tours.fr](mailto:gael.gautier@univ-tours.fr)

### **Supporting information**

The three samples were synthesized following the same experimental protocol except for the current density and the etching duration. The anodization of the 20  $\mu\text{m}$ -thick sample (porosity 45%) was performed at 80  $\text{mA}/\text{cm}^2$  for 4.5 minutes whereas the 50  $\mu\text{m}$ -thick one (porosity 40%) was obtained with a current density of 50  $\text{mA}/\text{cm}^2$  for 15 min.

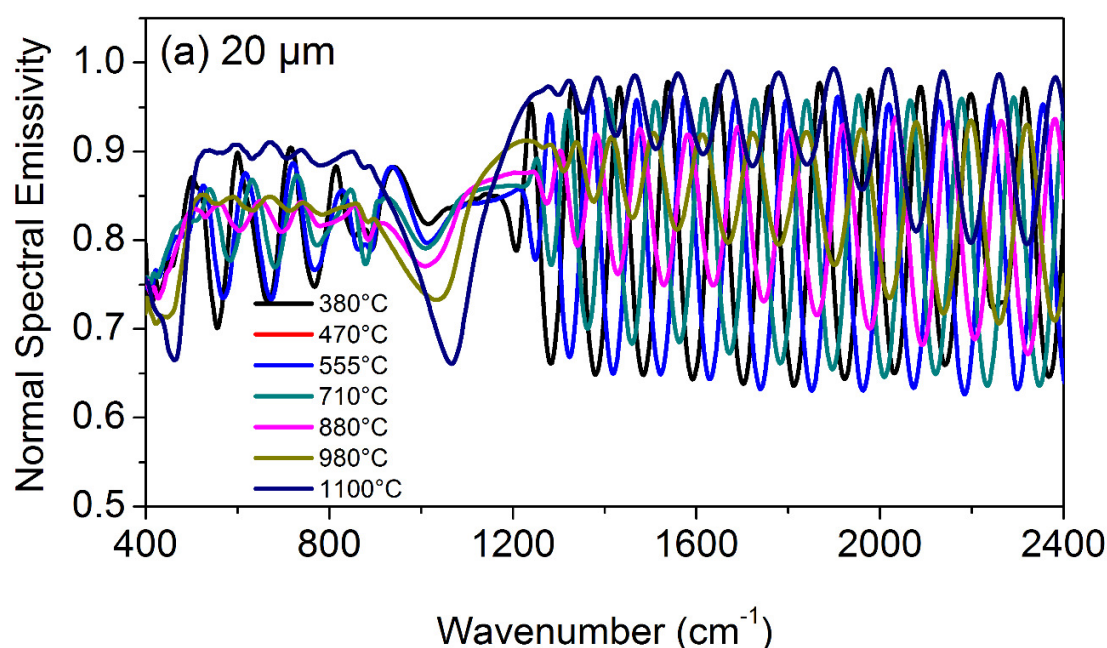

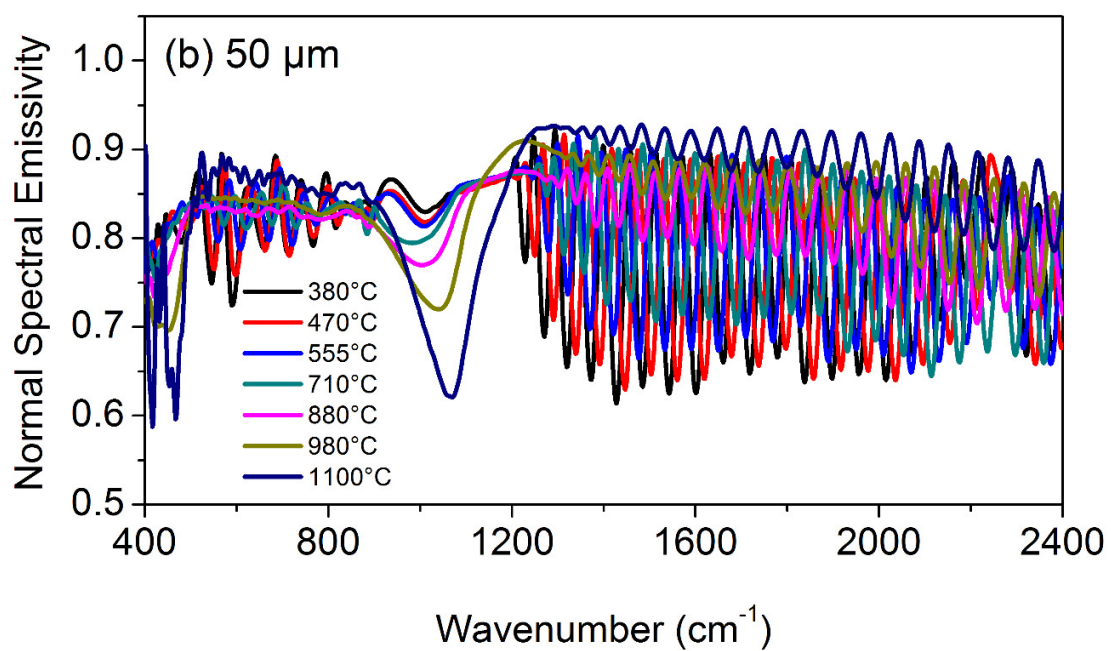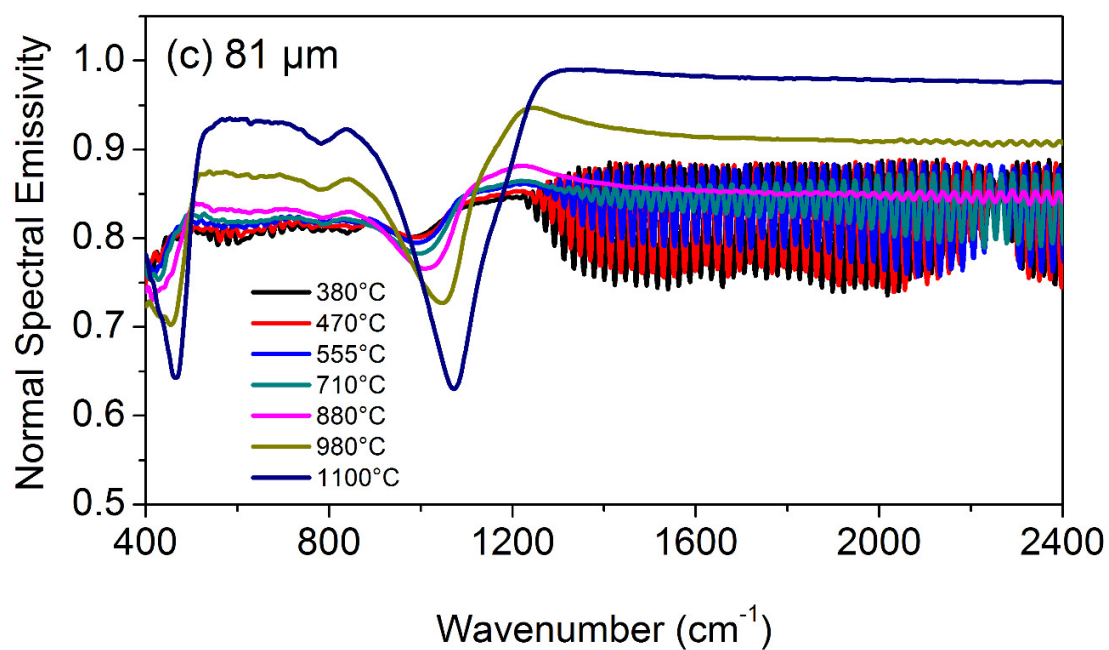

Figure S1-Evolution of normal spectral emissivity of 3 PS samples with thicknesses of 20  $\mu\text{m}$  (a), 50  $\mu\text{m}$  (b) and 81  $\mu\text{m}$  (c) from 380°C to 1100°C. The respective porosity of these samples is 45% (20  $\mu\text{m}$ ), 40% (50  $\mu\text{m}$ ) and 30% (81  $\mu\text{m}$ ).

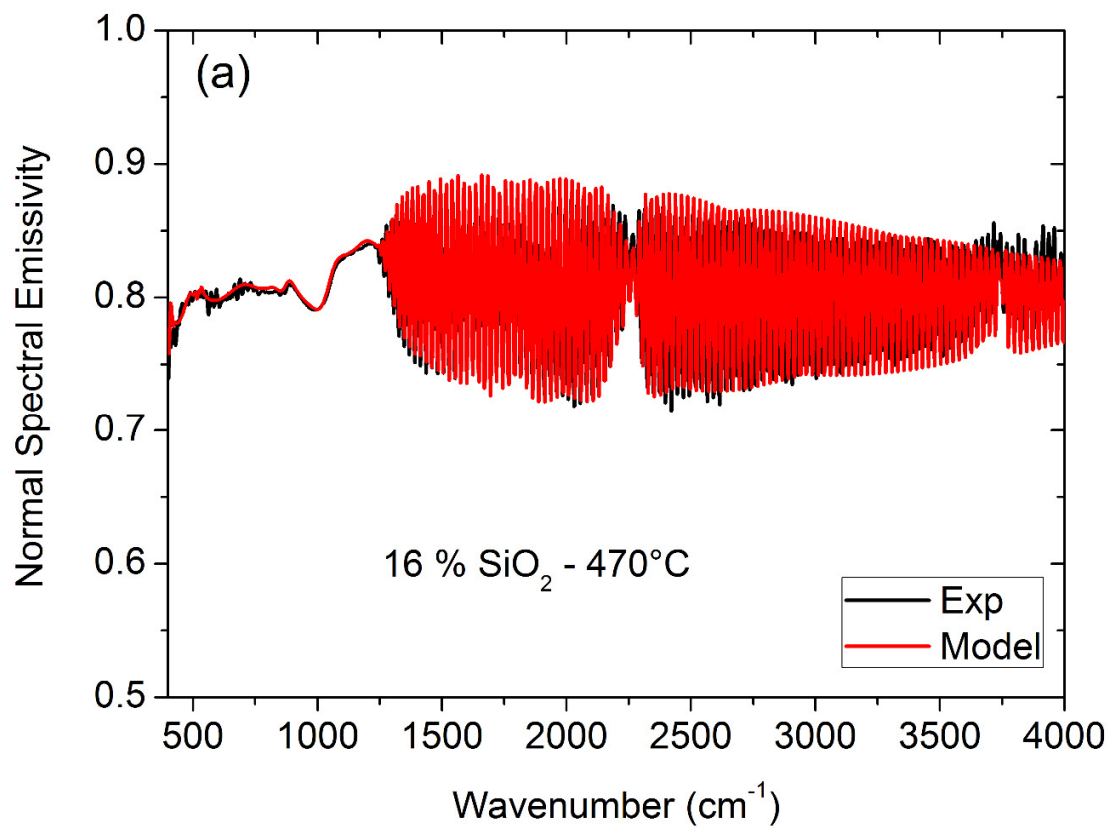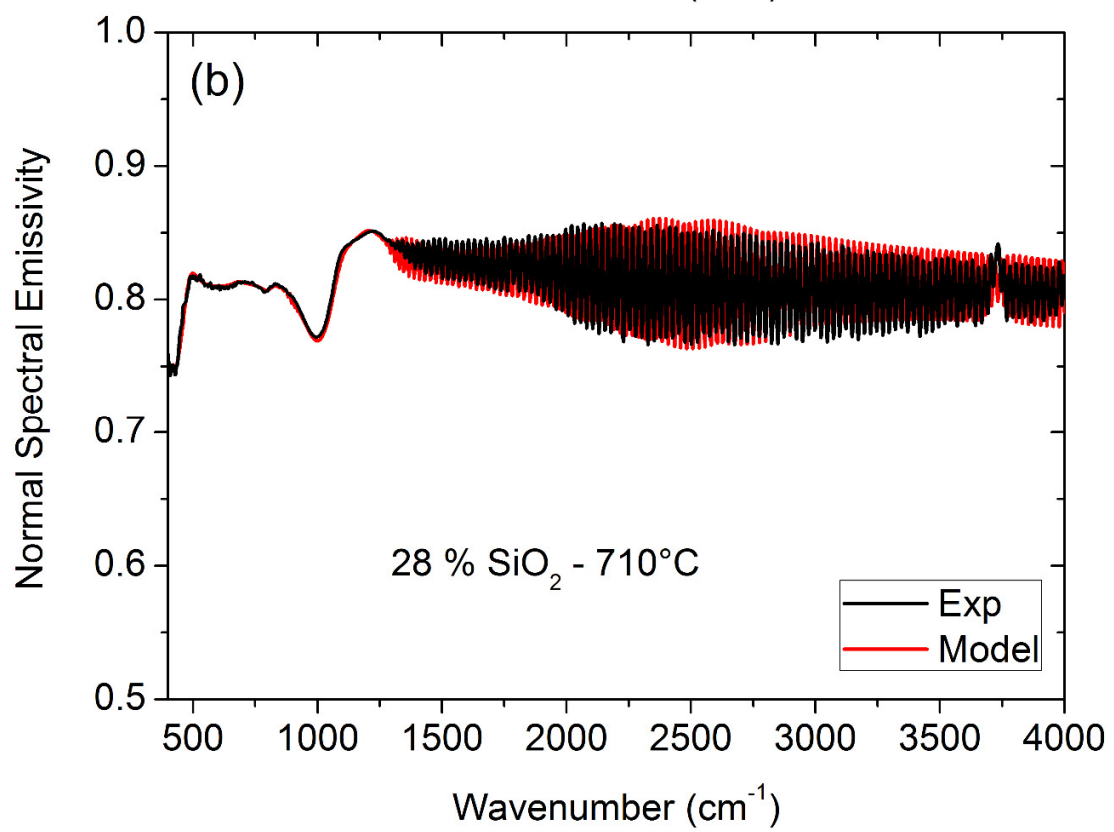

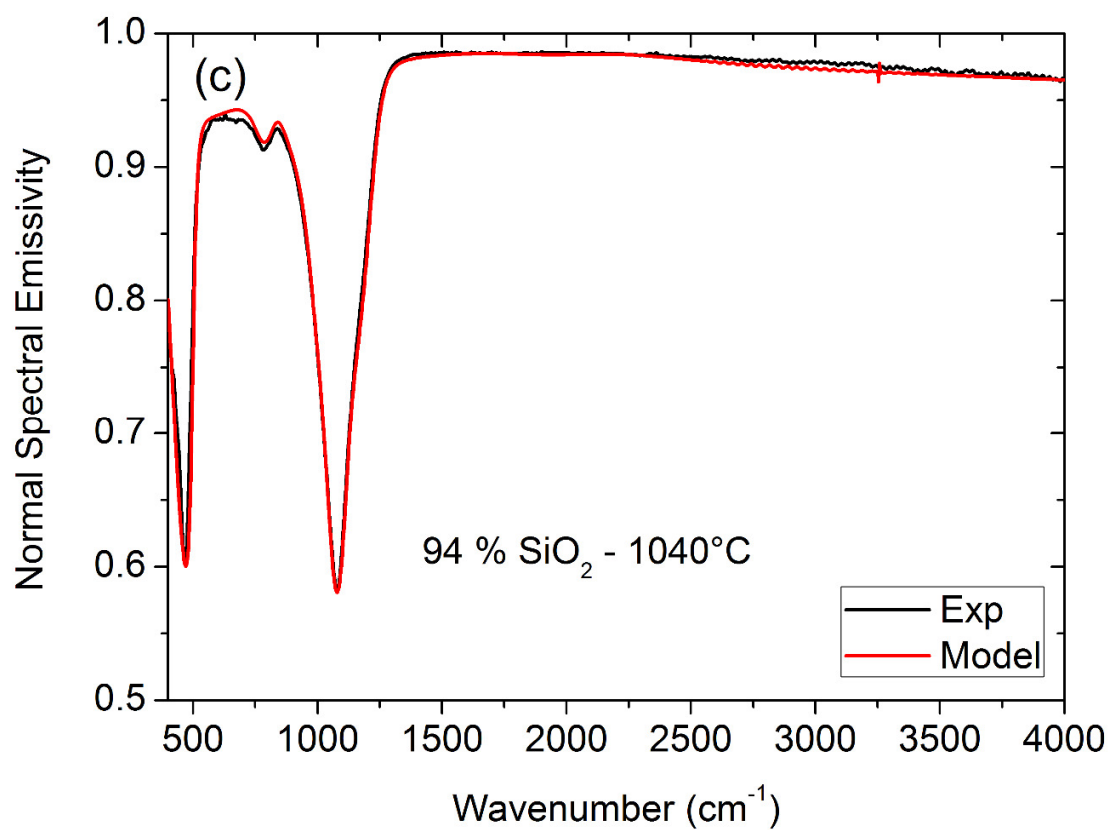

Figure S2-Typical evolution of the normal spectral emissivity showing the good correlation between experimental data (black) and fit (red) at three distinct temperatures: 470°C, 710°C and 1040°C

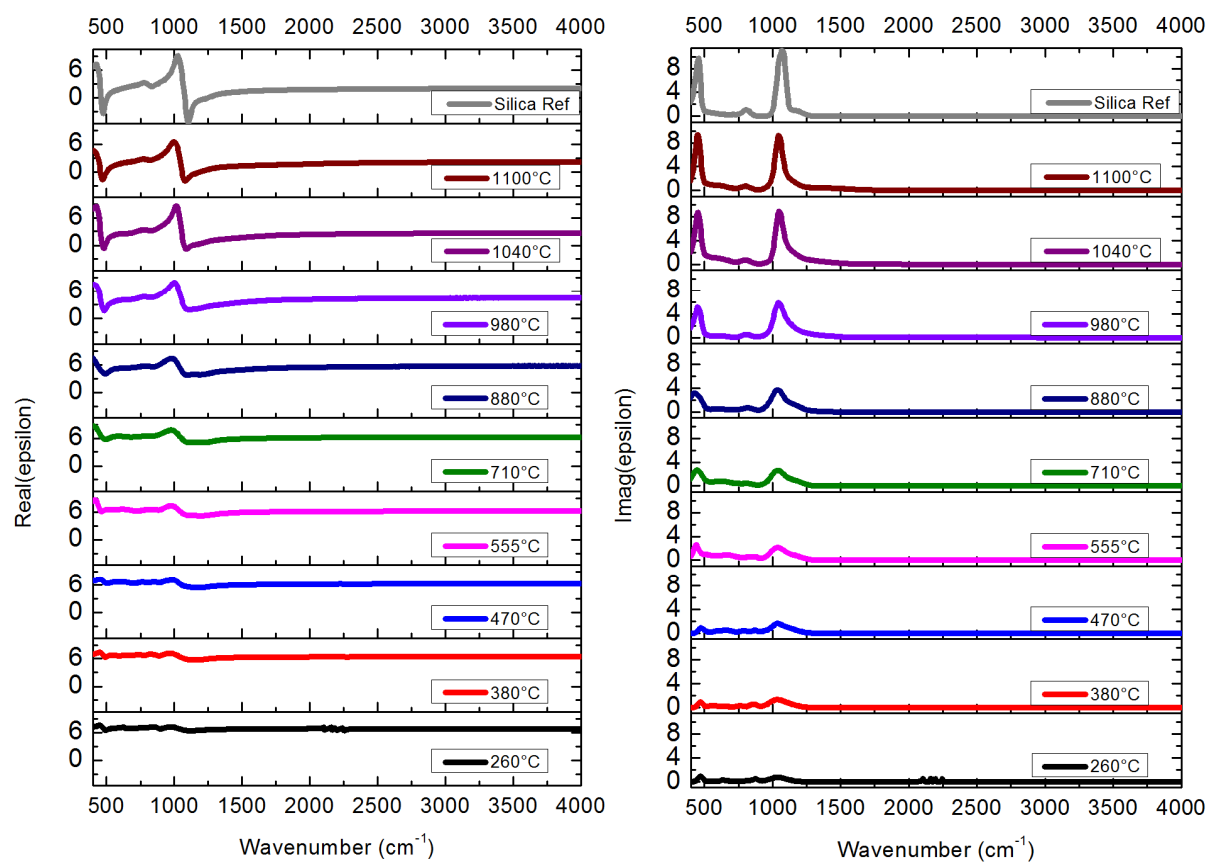

Figure S3-Evolution of the complex dielectric function (real part and imaginary part) of the effective medium extracted from the fitting procedure. The silica reference curve is added for comparison.

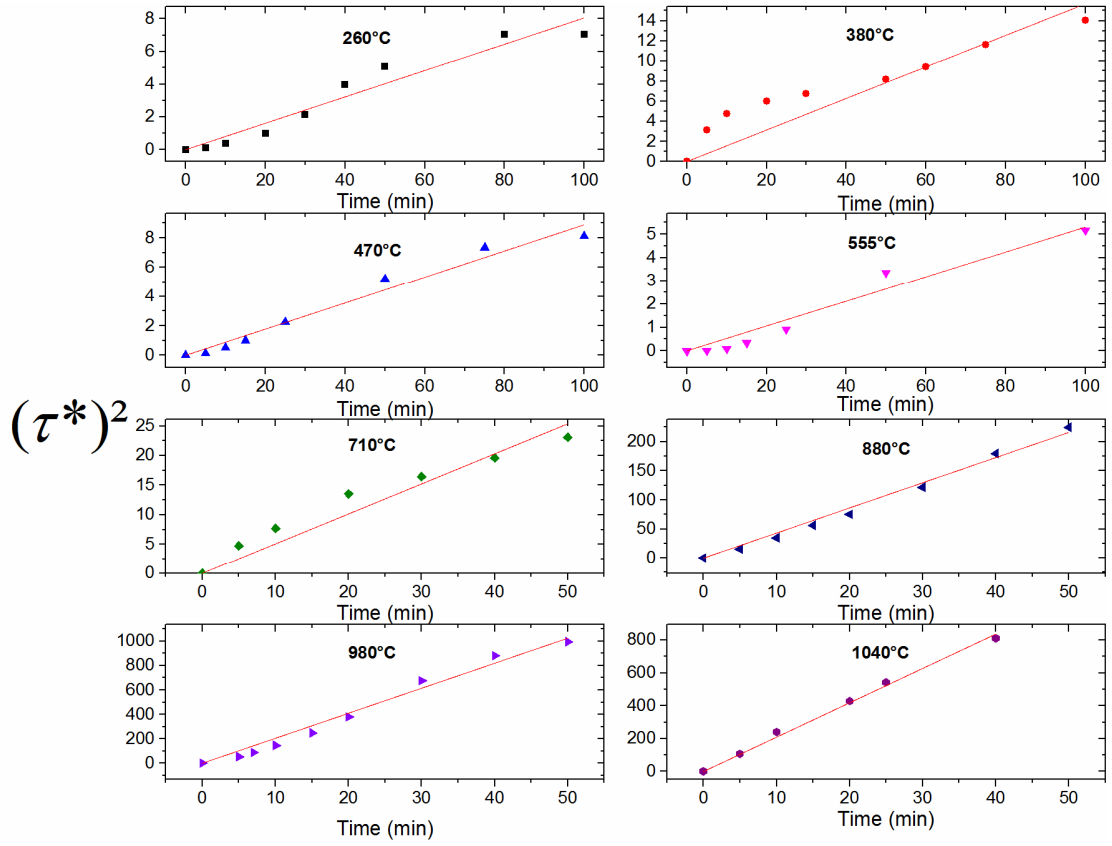

Figure S4 – Evolution of  $(\tau^*)^2$  with time. A linear fit (red curve) allows the estimation of the parameter  $k$  at each temperature.
